# Supplementary material for: Volatile Organic Compounds and Physiological Parameters as Markers of Potato (Solanum tuberosum L.) Infection with Phytopathogens
Source: MDPI journal article supplement (doi:10.3390/molecules27123708), 2022-06-09
Supplement: s1 [file s1]

Table S1. Volatile compounds identified from potato tubers contaminated with different phytopathogens (the results were expressed as means of peak area%, n=2)

| No. | Compound name                                  | RT    | RI   | Relative content (% peak area) |                      |      |       |       |       |      |      |       |      |       |      |
|-----|------------------------------------------------|-------|------|--------------------------------|----------------------|------|-------|-------|-------|------|------|-------|------|-------|------|
|     |                                                |       |      | Control_0*                     | After 14-day storage |      |       |       |       |      |      |       |      |       |      |
|     |                                                |       |      |                                | Control              | Aa   | As    | At    | Cc    | Fo   | Fs   | Pc    | Pe   | Rs    | Ss   |
| 1   | $\beta$ -Pinene                                | 18.59 | 962  | 0.92                           | nd                   | 0.14 | nd    | nd    | nd    | nd   | 0.15 | 0.98  | 0.38 | nd    | nd   |
| 2   | (+)-epi-Bicyclosquiphellandrene                | 28.47 | 1428 | nd                             | nd                   | nd   | nd    | nd    | nd    | nd   | 2.60 | nd    | nd   | nd    | nd   |
| 3   | 1-(1-Methoxypropan-2-yloxy)propan-2-yl acetate | 24.28 | 1159 | 1.58                           | nd                   | nd   | nd    | nd    | nd    | nd   | 1.12 | nd    | nd   | nd    | nd   |
| 4   | 1,1,3-Trimethylcyclopentane                    | 4.94  | 712  | nd                             | 0.16                 | nd   | nd    | nd    | nd    | 0.50 | nd   | nd    | nd   | nd    | nd   |
| 5   | 1,2,3-Trimethylbenzene                         | 20.23 | 998  | nd                             | nd                   | nd   | nd    | 15.62 | nd    | nd   | nd   | nd    | nd   | nd    | 1.00 |
| 6   | 1,2,3-Trimethylcyclopentane                    | 5.90  | 723  | nd                             | nd                   | nd   | nd    | nd    | nd    | 0.45 | nd   | nd    | nd   | nd    | nd   |
| 7   | 1,2,4-Trimethylbenzene                         | 19.17 | 974  | nd                             | nd                   | nd   | nd    | nd    | 14.09 | nd   | nd   | nd    | nd   | 29.12 | nd   |
| 8   | 1,2,4-Trimethylcyclopentane                    | 5.59  | 718  | nd                             | nd                   | nd   | nd    | nd    | nd    | 0.46 | nd   | nd    | 0.84 | nd    | nd   |
| 9   | 1,4-diethylbenzene                             | 21.29 | 1035 | nd                             | nd                   | nd   | 2.39  | nd    | nd    | nd   | 2.08 | nd    | nd   | nd    | 0.57 |
| 10  | 1-Butanol                                      | 3.31  | 633  | 0.52                           | 4.53                 | nd   | nd    | nd    | nd    | 0.58 | nd   | nd    | nd   | nd    | nd   |
| 11  | 1-Ethyl-3,5-dimethylbenzene                    | 21.46 | 1041 | nd                             | nd                   | nd   | nd    | 0.61  | nd    | 2.34 | nd   | nd    | nd   | nd    | nd   |
| 12  | 1-Ethyl-4-methylbenzene                        | 18.45 | 958  | nd                             | nd                   | nd   | nd    | nd    | nd    | 1.78 | nd   | nd    | nd   | nd    | nd   |
| 13  | 1-Methyl-3-propylbenzene                       | 21.37 | 1037 | nd                             | nd                   | nd   | 1.07  | 1.64  | 0.82  | 1.76 | 1.12 | 1.45  | 0.38 | 0.87  | 0.54 |
| 14  | 1-Methyl-4-propylbenzene                       | 21.18 | 1031 | nd                             | nd                   | nd   | nd    | nd    | nd    | nd   | 0.35 | nd    | nd   | nd    | nd   |
| 15  | 1-Methylnaphthalene                            | 26.40 | 1282 | nd                             | nd                   | nd   | nd    | nd    | nd    | nd   | 0.34 | nd    | nd   | nd    | nd   |
| 16  | 1-Nonanol                                      | 23.49 | 1119 | 1.49                           | nd                   | nd   | nd    | nd    | nd    | nd   | nd   | nd    | nd   | nd    | nd   |
| 17  | 1-Octen-3-ol                                   | 18.81 | 966  | 12.20                          | nd                   | nd   | nd    | 4.18  | nd    | nd   | 0.97 | 1.48  | 1.00 | nd    | nd   |
| 18  | 1-Octen-3-one                                  | 18.45 | 958  | 0.88                           | nd                   | 1.25 | 10.46 | nd    | 3.30  | 1.23 | nd   | nd    | 2.16 | nd    | nd   |
| 19  | 1-Octene                                       | 8.34  | 778  | 0.30                           | nd                   | nd   | nd    | nd    | nd    | nd   | nd   | nd    | nd   | nd    | nd   |
| 20  | 1-Pentanol                                     | 6.70  | 744  | 0.52                           | nd                   | nd   | nd    | nd    | nd    | nd   | nd   | nd    | nd   | nd    | nd   |
| 21  | 2 - Ethyl - 1,4 - dimethyl - benzene           | 22.07 | 1063 | nd                             | nd                   | nd   | nd    | 1.80  | nd    | nd   | nd   | nd    | 1.32 | nd    | nd   |
| 22  | 2-(Hexyloxy)ethanol                            | 22.83 | 1090 | 0.39                           | nd                   | nd   | nd    | nd    | nd    | nd   | nd   | nd    | nd   | nd    | nd   |
| 23  | 2,4-Dimethylheptane                            | 11.00 | 825  | 0.40                           | 0.23                 | nd   | nd    | nd    | nd    | nd   | 0.29 | nd    | 2.62 | 1.61  | 0.93 |
| 24  | 2,4-Dimethylpentane                            | 2.82  | 606  | nd                             | nd                   | nd   | nd    | 1.15  | nd    | 0.86 | nd   | nd    | nd   | nd    | nd   |
| 25  | 2,5-Dimethylhexane                             | 5.38  | 714  | nd                             | nd                   | nd   | nd    | nd    | nd    | 0.51 | nd   | nd    | nd   | nd    | nd   |
| 26  | 2,6,11-Trimethyldodecane                       | 22.13 | 1065 | nd                             | nd                   | nd   | nd    | 2.61  | nd    | nd   | nd   | nd    | nd   | nd    | nd   |
| 27  | 2,6-Dimethylundecane                           | 25.34 | 1216 | nd                             | 0.74                 | nd   | nd    | nd    | nd    | nd   | nd   | nd    | nd   | nd    | nd   |
| 28  | 2-Butanol                                      | 2.40  | 561  | 0.14                           | nd                   | nd   | nd    | nd    | nd    | nd   | 0.27 | 0.95  | nd   | nd    | nd   |
| 29  | 2-Butanone                                     | 2.26  | 543  | 1.10                           | 0.55                 | nd   | nd    | nd    | nd    | nd   | nd   | nd    | nd   | nd    | nd   |
| 30  | 2-Butoxyethanol                                | 15.19 | 890  | nd                             | 5.73                 | nd   | nd    | 0.47  | nd    | 0.24 | nd   | 18.00 | nd   | nd    | nd   |
| 31  | 2-Ethyl-3-hydroxyhexyl 2-methylpropanoate      | 27.44 | 1353 | 5.49                           | nd                   | nd   | nd    | nd    | nd    | nd   | nd   | nd    | nd   | nd    | nd   |
| 32  | 2-Heptanone                                    | 14.20 | 875  | 0.58                           | nd                   | nd   | nd    | nd    | nd    | nd   | nd   | nd    | nd   | nd    | nd   |
| 33  | 2-Hexanone                                     | 7.36  | 758  | 0.37                           | nd                   | nd   | nd    | nd    | nd    | nd   | nd   | nd    | 0.60 | nd    | nd   |

nd -not detected; \* - control sample before storage

Table S1. Continued

| No. | Compound name                                      | RT    | RI   | Relative content (% peak area) |                      |      |       |      |      |      |      |      |       |       |       |
|-----|----------------------------------------------------|-------|------|--------------------------------|----------------------|------|-------|------|------|------|------|------|-------|-------|-------|
|     |                                                    |       |      | Control_0*                     | After 14-day storage |      |       |      |      |      |      |      |       |       |       |
|     |                                                    |       |      |                                | Control              | Aa   | As    | At   | Cc   | Fo   | Fs   | Pc   | Pe    | Rs    | Ss    |
| 34  | 2-Methyl-1-butanol                                 | 5.32  | 716  | 0.31                           | 0.13                 | 0.50 | nd    | nd   | nd   | nd   | 0.08 | 0.49 | nd    | nd    | nd    |
| 35  | 2-Methylheptane                                    | 6.97  | 733  | nd                             | nd                   | nd   | nd    | nd   | nd   | 2.98 | nd   | nd   | nd    | nd    | nd    |
| 36  | 2-Methylhexane                                     | 3.48  | 642  | nd                             | 1.07                 | nd   | nd    | 2.42 | 0.63 | 4.28 | nd   | 1.13 | nd    | nd    | nd    |
| 37  | 2-Methylpropanal                                   | 1.98  | 507  | 0.33                           | nd                   | nd   | nd    | nd   | nd   | nd   | nd   | nd   | nd    | nd    | nd    |
| 38  | 2-Methylpropanol                                   | 2.73  | 601  | 0.32                           | nd                   | nd   | nd    | nd   | nd   | nd   | nd   | nd   | nd    | nd    | nd    |
| 39  | 2-Nonen-1-ol                                       | 21.92 | 1057 | 1.47                           | nd                   | nd   | 0.72  | 1.20 | nd   | nd   | 0.08 | nd   | nd    | nd    | nd    |
| 40  | 2-Octenal                                          | 21.29 | 1035 | 0.79                           | nd                   | nd   | nd    | nd   | nd   | nd   | nd   | nd   | nd    | nd    | nd    |
| 41  | 2-Pentanone                                        | 3.59  | 648  | nd                             | 0.32                 | nd   | nd    | nd   | nd   | nd   | nd   | nd   | nd    | nd    | nd    |
| 42  | 2-Pentylfuran                                      | 19.37 | 979  | 0.45                           | nd                   | nd   | nd    | nd   | nd   | nd   | 0.61 | 0.82 | nd    | nd    | nd    |
| 43  | 2-Phenylisopropanol                                | 21.99 | 1060 | 0.15                           | nd                   | nd   | nd    | nd   | nd   | nd   | nd   | nd   | nd    | nd    | 0.57  |
| 44  | 2-Propanone                                        | 1.67  | 87   | 1.56                           | nd                   | nd   | nd    | nd   | nd   | nd   | nd   | nd   | nd    | nd    | nd    |
| 45  | 3,3-Dimethylpentane                                | 5.67  | 721  | nd                             | nd                   | nd   | nd    | nd   | nd   | 0.21 | nd   | nd   | nd    | nd    | nd    |
| 46  | 3-Carene                                           | 20.21 | 997  | 4.07                           | nd                   | 3.73 | 9.14  | nd   | 6.87 | nd   | nd   | nd   | 6.15  | nd    | 4.91  |
| 47  | 3-Hydroxy-2,4,4-trimethylpentyl 2-methylpropanoate | 27.17 | 1334 | 3.55                           | nd                   | nd   | 3.20  | nd   | 0.57 | nd   | nd   | nd   | nd    | nd    | nd    |
| 48  | 3-Methyl-1-butanol                                 | 5.15  | 712  | 0.83                           | 0.14                 | 1.15 | 0.30  | nd   | nd   | nd   | nd   | 0.27 | nd    | nd    | 0.47  |
| 49  | 3-Methylbenzofuran                                 | 24.01 | 1146 | nd                             | nd                   | nd   | 1.44  | nd   | nd   | nd   | nd   | nd   | nd    | nd    | nd    |
| 50  | 3-Methylbutanal                                    | 2.94  | 612  | 1.09                           | nd                   | nd   | nd    | nd   | nd   | nd   | nd   | nd   | nd    | nd    | 1.26  |
| 51  | 2-Methylbutanal                                    | 3.10  | 621  | 2.06                           | nd                   | nd   | nd    | nd   | nd   | nd   | nd   | nd   | nd    | nd    | 1.64  |
| 52  | 3-Methylhexane                                     | 3.68  | 652  | 0.38                           | 1.41                 | 1.08 | nd    | 1.95 | 1.10 | 3.02 | nd   | 1.03 | nd    | nd    | nd    |
| 53  | 3-Methyloctane                                     | 13.83 | 868  | nd                             | nd                   | nd   | nd    | nd   | nd   | 0.40 | nd   | nd   | nd    | nd    | nd    |
| 54  | 3-Octanol                                          | 19.64 | 985  | 0.04                           | nd                   | nd   | nd    | nd   | nd   | nd   | 9.44 | nd   | nd    | nd    | nd    |
| 55  | 3-Octanone                                         | 18.84 | 967  | nd                             | nd                   | nd   | nd    | nd   | 4.70 | nd   | 0.55 | nd   | nd    | nd    | nd    |
| 56  | 4-Ethyl-1-octyn-3-ol                               | 24.42 | 1166 | 0.56                           | nd                   | nd   | nd    | nd   | nd   | nd   | nd   | nd   | nd    | nd    | nd    |
| 57  | 4-Heptanone                                        | 13.19 | 855  | nd                             | nd                   | nd   | nd    | nd   | nd   | 0.51 | nd   | nd   | nd    | nd    | nd    |
| 58  | 4-Methyloctane                                     | 13.75 | 861  | nd                             | nd                   | nd   | nd    | nd   | 0.46 | 0.53 | nd   | nd   | nd    | nd    | nd    |
| 59  | Acenaphthene                                       | 28.79 | 1453 | nd                             | nd                   | nd   | nd    | nd   | nd   | nd   | 0.79 | nd   | nd    | nd    | nd    |
| 60  | Acetic acid                                        | 2.36  | 556  | 2.04                           | nd                   | 9.31 | 16.45 | 1.09 | 7.54 | 1.58 | 1.21 | 1.02 | 10.79 | 19.97 | 11.91 |
| 61  | Benzaldehyde                                       | 16.83 | 923  | nd                             | 2.98                 | nd   | nd    | nd   | nd   | nd   | nd   | nd   | nd    | nd    | nd    |
| 62  | Benzene                                            | 3.12  | 622  | nd                             | nd                   | nd   | 1.46  | 1.86 | nd   | 0.60 | 0.43 | 1.48 | nd    | nd    | nd    |
| 63  | Benzenecetaldehyde                                 | 20.37 | 1002 | 0.94                           | nd                   | nd   | nd    | nd   | nd   | nd   | nd   | nd   | nd    | nd    | nd    |
| 64  | Benzothiazole                                      | 24.76 | 1184 | nd                             | nd                   | nd   | nd    | 0.98 | nd   | nd   | nd   | nd   | nd    | nd    | nd    |
| 65  | Benzyl ethanoate                                   | 23.75 | 1132 | 0.34                           | nd                   | nd   | nd    | nd   | nd   | nd   | 0.16 | nd   | nd    | nd    | nd    |
| 66  | Chamigrene                                         | 28.98 | 1468 | nd                             | nd                   | nd   | nd    | nd   | nd   | nd   | 3.75 | nd   | nd    | nd    | nd    |
| 67  | cis-1,3-Dimethylcyclopentane                       | 3.85  | 662  | nd                             | 0.18                 | nd   | nd    | nd   | nd   | 0.38 | nd   | nd   | nd    | nd    | nd    |

nd -not detected; \* - control sample before storage

Table S1. Continued

| No. | Compound name        | RT    | RI   | Relative content (% peak area) |                      |       |      |       |       |      |      |       |       |      |       |
|-----|----------------------|-------|------|--------------------------------|----------------------|-------|------|-------|-------|------|------|-------|-------|------|-------|
|     |                      |       |      | Control_0*                     | After 14-day storage |       |      |       |       |      |      |       |       |      |       |
|     |                      |       |      |                                | Control              | Aa    | As   | At    | Cc    | Fo   | Fs   | Pc    | Pe    | Rs   | Ss    |
| 68  | Cyclohexane          | 3.28  | 631  | nd                             | nd                   | nd    | nd   | 0.77  | nd    | 0.62 | nd   | nd    | nd    | nd   | nd    |
| 69  | Cyclohexanone        | 13.29 | 859  | nd                             | nd                   | nd    | nd   | nd    | nd    | 0.90 | nd   | nd    | nd    | nd   | nd    |
| 70  | Cyclopentanone       | 6.65  | 747  | nd                             | nd                   | nd    | nd   | nd    | nd    | nd   | nd   | nd    | nd    | nd   | 0.53  |
| 71  | D-Carvone            | 25.26 | 1211 | 0.81                           | nd                   | nd    | nd   | nd    | nd    | nd   | nd   | nd    | nd    | nd   | nd    |
| 72  | Decanal              | 24.77 | 1184 | 1.37                           | nd                   | 2.23  | 5.17 | 1.51  | 2.46  | 0.57 | 1.53 | nd    | 3.58  | 7.09 | 9.27  |
| 73  | Decane               | 20.29 | 999  | 0.65                           | 4.96                 | 0.57  | nd   | 10.36 | 2.17  | 4.08 | 0.63 | 2.25  | 1.94  | nd   | nd    |
| 74  | dibenzo-furan        | 29.23 | 1487 | 0.53                           | nd                   | 1.37  | 4.08 | nd    | 2.49  | nd   | 2.75 | 0.49  | nd    | 5.83 | nd    |
| 75  | Dihydrocitronellol   | 23.70 | 1130 | 1.76                           | nd                   | nd    | nd   | nd    | nd    | nd   | nd   | nd    | nd    | nd   | nd    |
| 76  | Dihydromyrcenol      | 22.05 | 1062 | 1.37                           | nd                   | nd    | nd   | nd    | nd    | nd   | nd   | nd    | nd    | nd   | nd    |
| 77  | Dimethyl disulfide   | 5.00  | 709  | nd                             | nd                   | nd    | nd   | nd    | nd    | nd   | 0.49 | nd    | nd    | nd   | nd    |
| 78  | D-Limonene           | 20.82 | 1018 | nd                             | nd                   | 34.19 | nd   | nd    | 20.18 | nd   | nd   | 32.72 | nd    | nd   | 25.24 |
| 79  | Dodecane             | 25.06 | 1200 | 1.16                           | 2.37                 | 1.14  | nd   | 0.58  | 0.99  | 2.42 | 0.43 | 1.66  | 2.00  | nd   | 1.76  |
| 80  | Ethenylbenzene       | 13.93 | 871  | 0.55                           | 0.53                 | 7.08  | 2.36 | 1.15  | 3.62  | 2.18 | 0.35 | nd    | 14.01 | nd   | 1.67  |
| 81  | Ethyl acetate        | 2.51  | 575  | nd                             | 0.29                 | nd    | nd   | nd    | nd    | nd   | nd   | nd    | nd    | nd   | nd    |
| 82  | Ethyl octanoate      | 24.72 | 1182 | 0.12                           | nd                   | nd    | nd   | nd    | nd    | nd   | nd   | nd    | nd    | nd   | nd    |
| 83  | Ethylbenzene         | 12.34 | 846  | 0.36                           | 2.15                 | 0.65  | 1.28 | 1.26  | 0.74  | nd   | 0.27 | 1.01  | 1.19  | 1.62 | 0.37  |
| 84  | Ethylcyclobutane     | 13.59 | 865  | 0.49                           | nd                   | nd    | nd   | nd    | nd    | nd   | nd   | nd    | nd    | nd   | nd    |
| 85  | Ethylcyclopentane    | 5.24  | 714  | nd                             | 0.23                 | nd    | nd   | nd    | nd    | 0.51 | nd   | nd    | nd    | nd   | nd    |
| 86  | Eucalyptol           | 20.75 | 1016 | nd                             | nd                   | nd    | nd   | nd    | nd    | nd   | nd   | nd    | nd    | nd   | 0.89  |
| 87  | Heptanal             | 14.65 | 882  | 0.30                           | nd                   | nd    | nd   | nd    | nd    | nd   | nd   | nd    | nd    | 0.92 | 0.92  |
| 88  | Heptane              | 4.31  | 686  | 0.48                           | 3.87                 | 2.06  | 1.19 | 1.18  | 2.83  | 5.66 | nd   | 1.41  | nd    | nd   | nd    |
| 89  | Hexadecane           | 30.59 | 1600 | 0.64                           | nd                   | nd    | nd   | nd    | nd    | nd   | nd   | nd    | nd    | nd   | 0.35  |
| 90  | Hexanal              | 7.66  | 764  | 3.92                           | 0.66                 | nd    | 1.20 | nd    | nd    | nd   | 0.17 | nd    | nd    | 1.92 | 1.63  |
| 91  | Hexane               | 2.45  | 567  | 0.13                           | 0.21                 | 5.70  | nd   | 2.49  | 2.52  | 3.11 | nd   | nd    | 11.81 | nd   | nd    |
| 92  | Hexanoic acid        | 19.27 | 977  | 0.12                           | nd                   | nd    | nd   | nd    | nd    | nd   | nd   | nd    | nd    | nd   | nd    |
| 93  | Indane               | 20.55 | 1008 | 0.18                           | 7.27                 | nd    | 2.85 | 5.40  | 0.67  | 0.03 | 2.67 | 3.14  | 1.21  | 0.62 | 1.59  |
| 94  | Isoborneol           | 24.01 | 1148 | 0.79                           | nd                   | nd    | nd   | nd    | nd    | nd   | 0.15 | nd    | nd    | nd   | nd    |
| 95  | Isobutylbenzene      | 19.86 | 987  | nd                             | nd                   | nd    | nd   | 2.74  | nd    | nd   | nd   | nd    | nd    | nd   | nd    |
| 96  | Isopropylbenzene     | 15.99 | 916  | 0.07                           | 5.60                 | nd    | nd   | 0.96  | nd    | 1.79 | 1.45 | 1.19  | nd    | nd   | nd    |
| 97  | Isopropylcyclohexane | 16.15 | 904  | nd                             | nd                   | nd    | nd   | nd    | nd    | 0.20 | 0.59 | nd    | nd    | nd   | nd    |

nd -not detected; \* - control sample before storage

Table S1. Continued

| No  | Compound name                  | RT    | RI   | Relative content (% peak area) |                      |       |      |      |      |       |       |      |      |      |      |      |
|-----|--------------------------------|-------|------|--------------------------------|----------------------|-------|------|------|------|-------|-------|------|------|------|------|------|
|     |                                |       |      | Control_0*                     | After 14-day storage |       |      |      |      |       |       |      |      |      |      |      |
|     |                                |       |      |                                | Control              | Aa    | As   | At   | Cc   | Fo    | Fs    | Pc   | Pe   | Rs   | Ss   |      |
| 98  | Longifolene                    | 28.16 | 1405 | 0.23                           | nd                   | nd    | nd   | nd   | nd   | 0.22  | 0.25  | nd   | nd   | nd   | nd   | 0.98 |
| 99  | L- $\alpha$ -Terpineol         | 24.49 | 1170 | 0.29                           | nd                   | nd    | nd   | nd   | nd   | nd    | nd    | nd   | nd   | nd   | nd   | nd   |
| 100 | m-Cymene                       | 20.50 | 1006 | 3.11                           | 0.49                 | 0.90  | 1.65 | 2.00 | 0.95 | 6.12  | 0.54  | 1.12 | 1.75 | 0.83 | 1.03 |      |
| 101 | Methylbenzene                  | 6.18  | 733  | 1.98                           | 0.71                 | 3.52  | 6.74 | 3.96 | 3.09 | 3.19  | 0.79  | 3.47 | 5.56 | 5.39 | 2.64 |      |
| 102 | Methylcyclopentane             | 2.76  | 603  | nd                             | nd                   | nd    | nd   | 0.70 | nd   | 0.88  | nd    | nd   | nd   | nd   | nd   |      |
| 103 | Methylcyclohexane              | 4.83  | 706  | 0.19                           | 2.92                 | 1.65  | 0.69 | 4.64 | 2.08 | 8.78  | nd    | 0.91 | nd   | nd   | nd   |      |
| 104 | m-Xylene                       | 12.97 | 855  | 0.38                           | 1.90                 | nd    | nd   | 0.22 | nd   | 1.86  | nd    | 1.65 | 1.92 | 2.84 | nd   |      |
| 105 | Naphthalene                    | 24.17 | 1154 | 1.81                           | nd                   | nd    | nd   | nd   | nd   | nd    | 2.01  | nd   | nd   | nd   | nd   |      |
| 106 | Nonanal                        | 22.66 | 1084 | 1.78                           | 1.57                 | 3.04  | 5.59 | 1.91 | 3.79 | nd    | 1.31  | 1.95 | 4.57 | 8.62 | 9.98 |      |
| 107 | Nonane                         | 15.73 | 899  | 0.22                           | 2.08                 | 0.41  | nd   | 0.18 | nd   | 1.51  | 0.26  | 0.83 | 3.74 | nd   | nd   |      |
| 108 | Octanal                        | 19.50 | 982  | 0.47                           | nd                   | 0.23  | 1.63 | nd   | 0.69 | nd    | 0.27  | 0.07 | 0.65 | 1.77 | 3.07 |      |
| 109 | Octane                         | 9.17  | 795  | 0.36                           | nd                   | nd    | nd   | nd   | nd   | 2.31  | nd    | nd   | 0.97 | nd   | nd   |      |
| 110 | o-Xylene                       | 14.15 | 880  | nd                             | 4.83                 | nd    | nd   | 3.10 | nd   | 3.82  | 1.59  | nd   | 3.59 | nd   | 2.15 |      |
| 111 | p-Cymene                       | 20.42 | 1003 | 0.61                           | 2.27                 | 0.67  | 1.22 | 1.77 | 1.26 | 1.11  | 1.06  | 2.01 | 1.64 | 1.51 | 2.82 |      |
| 112 | Pentadecane                    | 29.38 | 1500 | 1.25                           | nd                   | 0.06  | nd   | 0.52 | nd   | nd    | nd    | 0.57 | nd   | 0.45 | nd   |      |
| 113 | Pentanal                       | 3.73  | 655  | 0.22                           | nd                   | nd    | nd   | nd   | nd   | nd    | nd    | nd   | nd   | nd   | nd   |      |
| 114 | Pentane                        | 1.71  | 89   | 3.74                           | 0.58                 | 3.77  | nd   | nd   | nd   | nd    | nd    | nd   | nd   | nd   | nd   |      |
| 115 | Pentanoic acid                 | 14.98 | 887  | 0.53                           | nd                   | nd    | nd   | nd   | nd   | nd    | nd    | nd   | nd   | nd   | nd   |      |
| 116 | Phenol                         | 18.85 | 967  | nd                             | 1.31                 | nd    | nd   | nd   | nd   | nd    | nd    | nd   | nd   | nd   | nd   |      |
| 117 | Propylbenzene                  | 17.37 | 935  | 1.08                           | 21.99                | nd    | 5.05 | 7.13 | nd   | 12.68 | 5.25  | 6.56 | nd   | nd   | 2.00 |      |
| 118 | Propylcyclohexane              | 16.72 | 920  | nd                             | 0.89                 | nd    | nd   | nd   | 0.23 | nd    | nd    | nd   | nd   | nd   | nd   |      |
| 119 | p-Xylene                       | 12.91 | 854  | 0.88                           | 6.11                 | 2.83  | 5.27 | 3.80 | 2.01 | 4.32  | 1.22  | 3.98 | 3.62 | 4.36 | 2.81 |      |
| 120 | Spiro[3.4]octan-5-one          | 20.69 | 1013 | nd                             | nd                   | nd    | nd   | nd   | nd   | nd    | 4.42  | nd   | nd   | nd   | nd   |      |
| 121 | Tetradecane                    | 28.09 | 1400 | 1.15                           | 0.23                 | 0.17  | 0.36 | nd   | 0.37 | nd    | 0.23  | 0.30 | nd   | nd   | 0.58 |      |
| 122 | trans-1,3-Dimethylcyclopentane | 3.79  | 658  | nd                             | 0.28                 | nd    | nd   | nd   | nd   | 0.48  | nd    | nd   | nd   | nd   | nd   |      |
| 123 | Tridecane                      | 26.67 | 1300 | 0.57                           | 0.60                 | 0.38  | nd   | 0.49 | nd   | 0.57  | 0.35  | nd   | 1.20 | nd   | 0.65 |      |
| 124 | Undecane                       | 23.09 | 1100 | 1.10                           | 4.93                 | nd    | nd   | nd   | nd   | nd    | nd    | nd   | nd   | nd   | nd   |      |
| 125 | Valencene                      | 29.25 | 1489 | nd                             | nd                   | nd    | nd   | 1.13 | nd   | nd    | 26.53 | nd   | nd   | nd   | nd   |      |
| 126 | $\alpha$ -Cubebene             | 27.76 | 1376 | nd                             | nd                   | nd    | 0.81 | nd   | nd   | 0.09  | 7.76  | nd   | nd   | 1.90 | nd   |      |
| 127 | $\alpha$ -Guaiene              | 28.71 | 1447 | nd                             | nd                   | nd    | nd   | nd   | nd   | nd    | 7.11  | nd   | nd   | nd   | nd   |      |
| 128 | $\alpha$ -Pinene               | 16.85 | 923  | 13.21                          | nd                   | 10.23 | 6.24 | 1.77 | 6.79 | 4.77  | 1.11  | 3.62 | 8.82 | 2.77 | 3.27 |      |
| 129 | $\beta$ -Cedrene               | 28.34 | 1419 | nd                             | nd                   | nd    | nd   | 0.69 | nd   | nd    | nd    | nd   | nd   | nd   | nd   |      |
| 130 | $\gamma$ -Terpinene            | 21.72 | 1050 | 0.93                           | nd                   | nd    | nd   | nd   | nd   | nd    | 0.07  | nd   | nd   | nd   | nd   |      |

nd -not detected; \* - control sample before storage
